# Supplementary material for: An investigation into the mechanism for Kaempferol improving melanocyte death based on network Pharmacology and experimental verification
Source: Springer Nature journal article supplement (doi:10.1038/s41598-025-91905-0), 2025-03-12

First time actin-22kDa

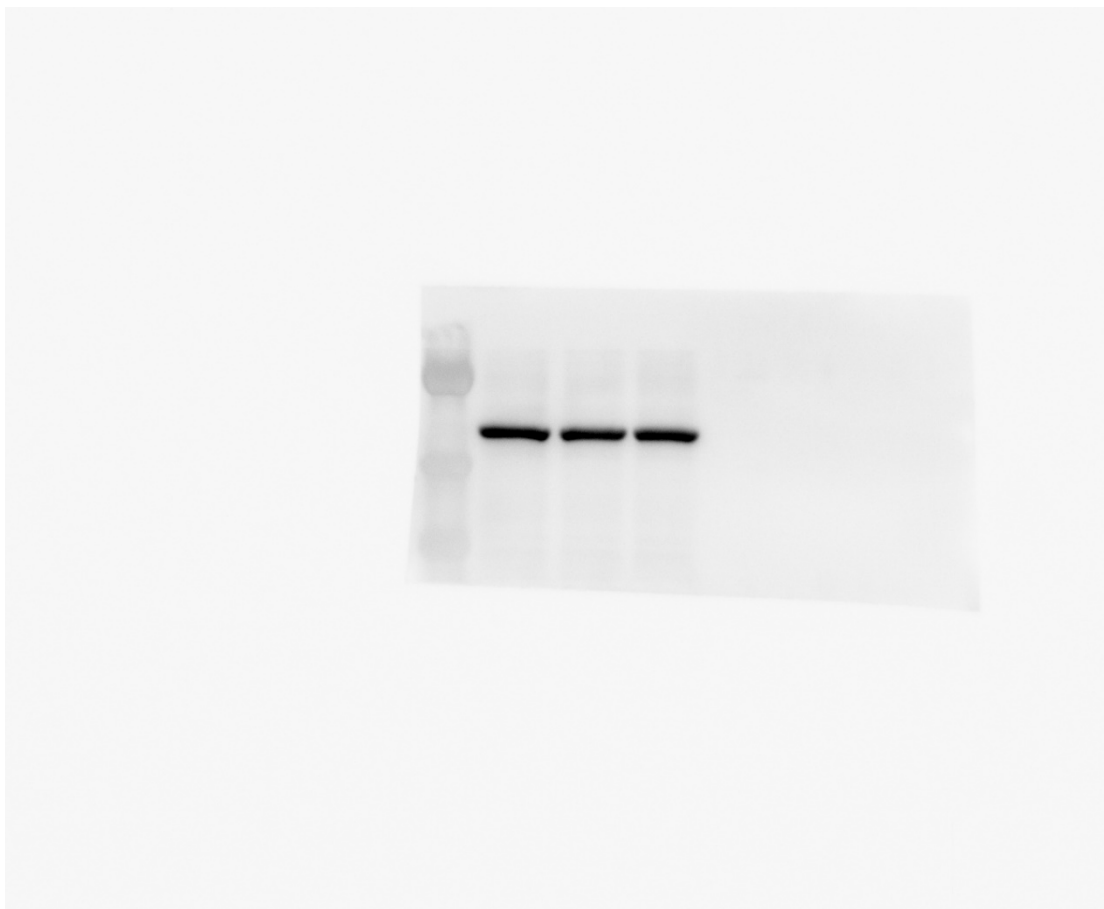

Second time actin-22kDa

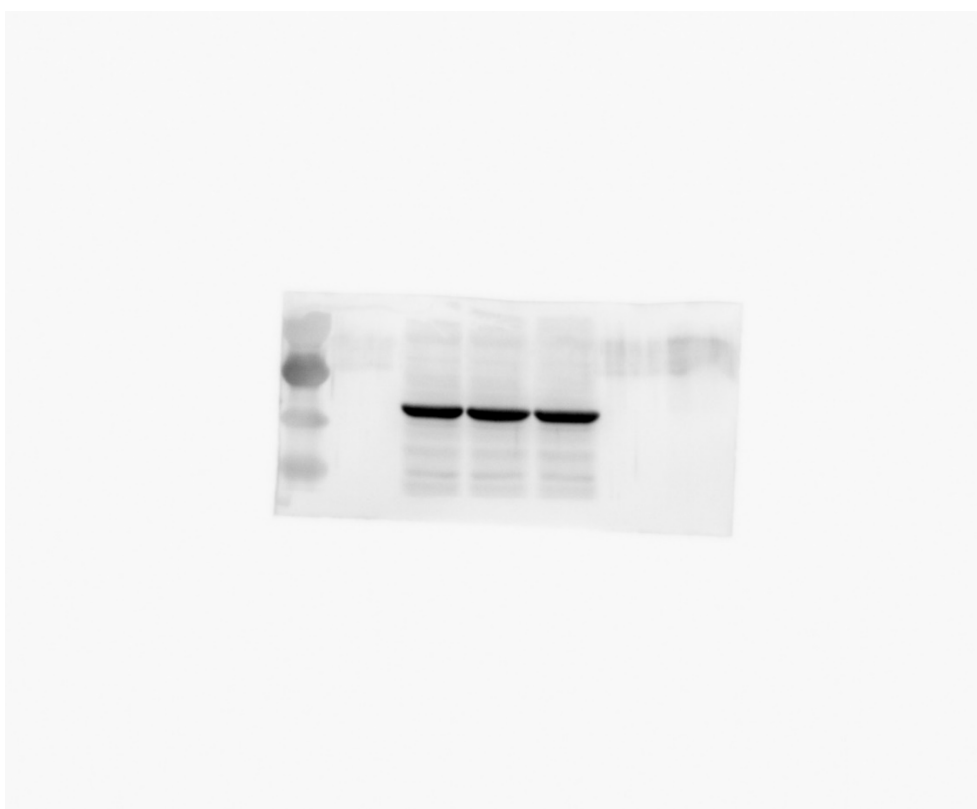

Third time actin-22kDa

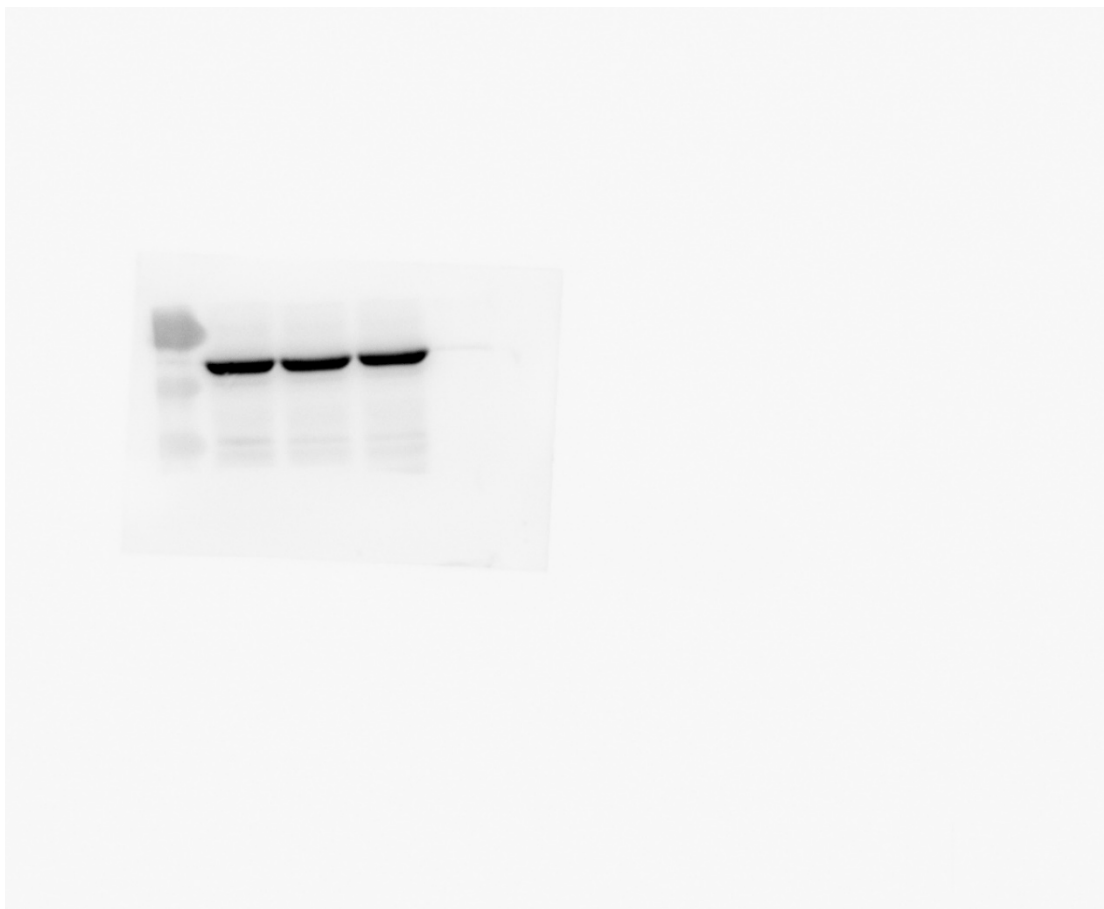

First time GPX4-42kDa

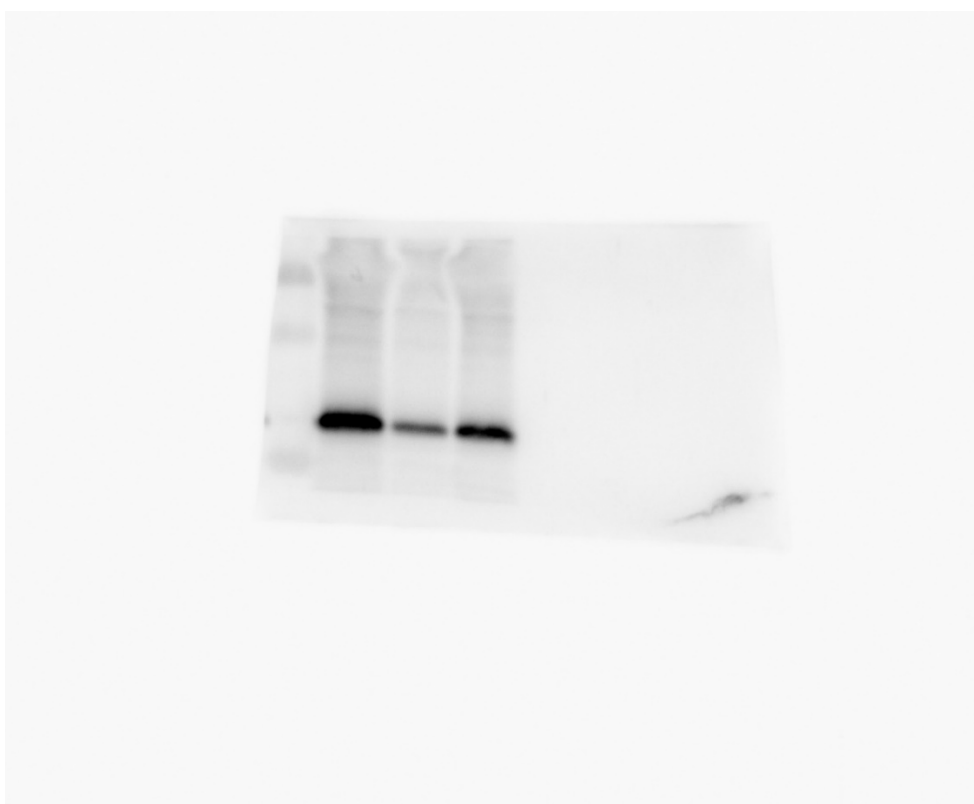

Second time GPX4-42kDa

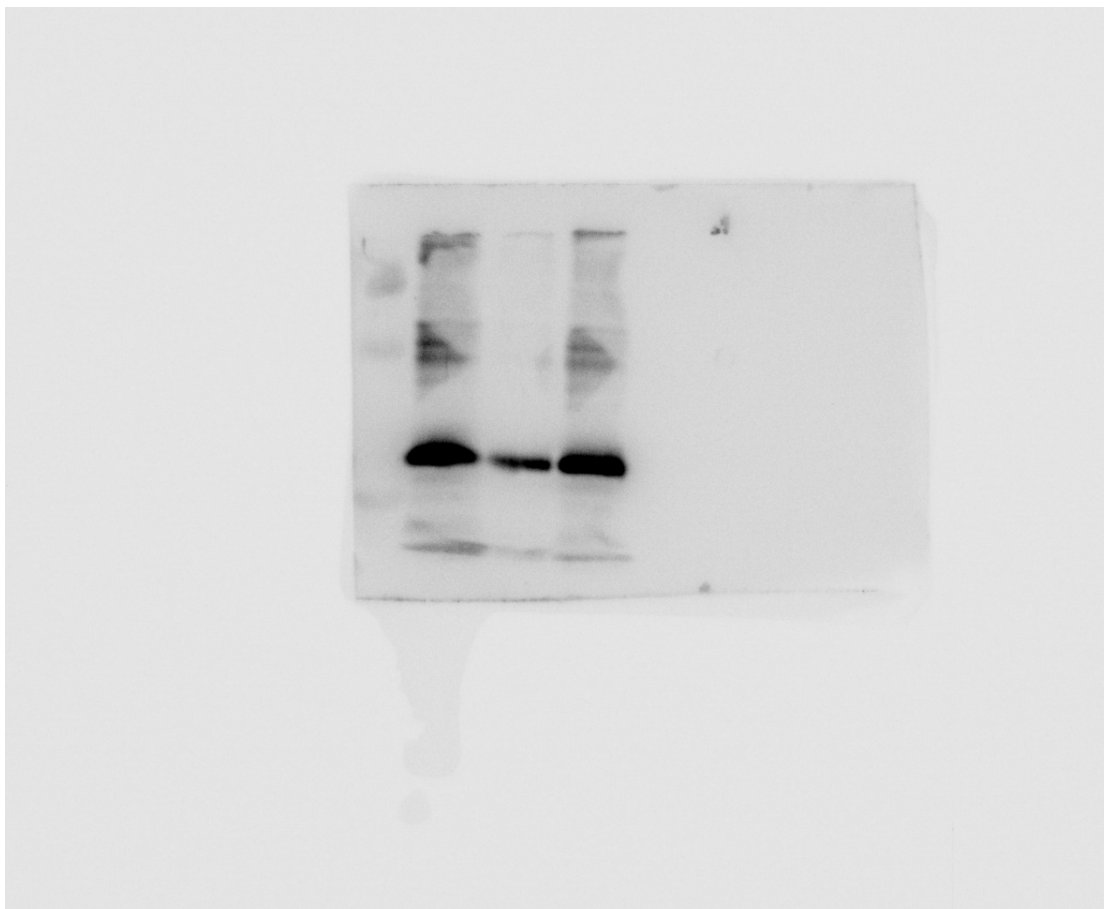

Third time GPX4-42kDa

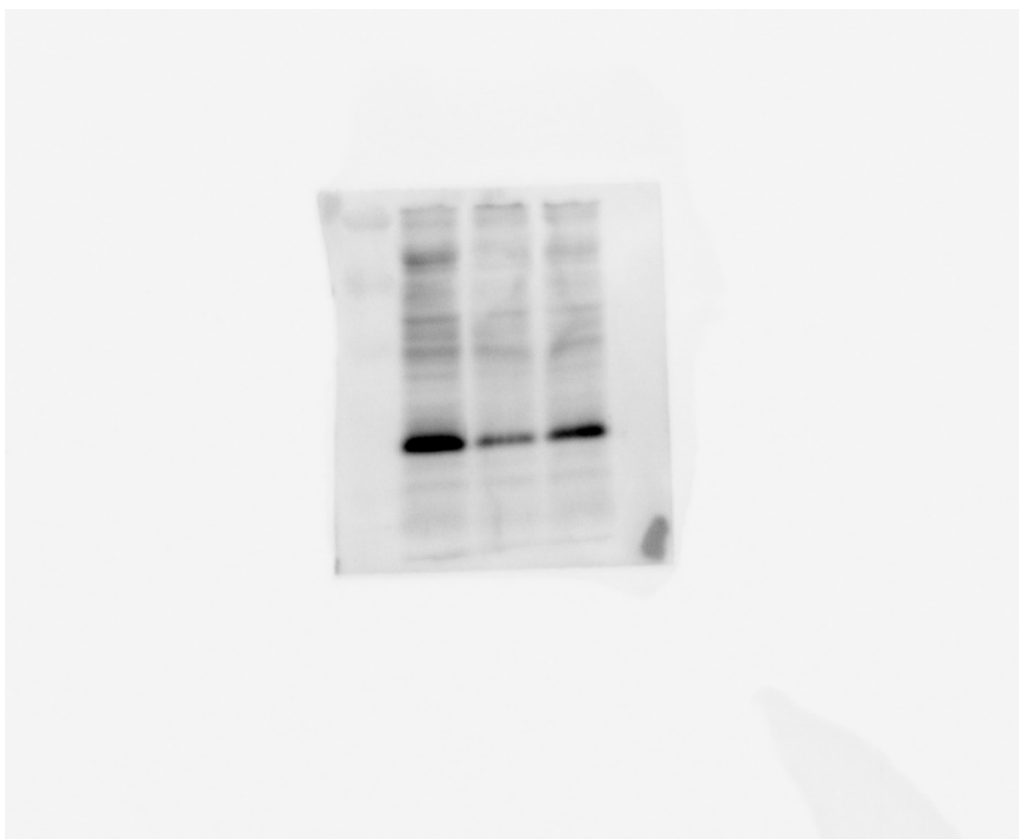

First time actin-22kDa

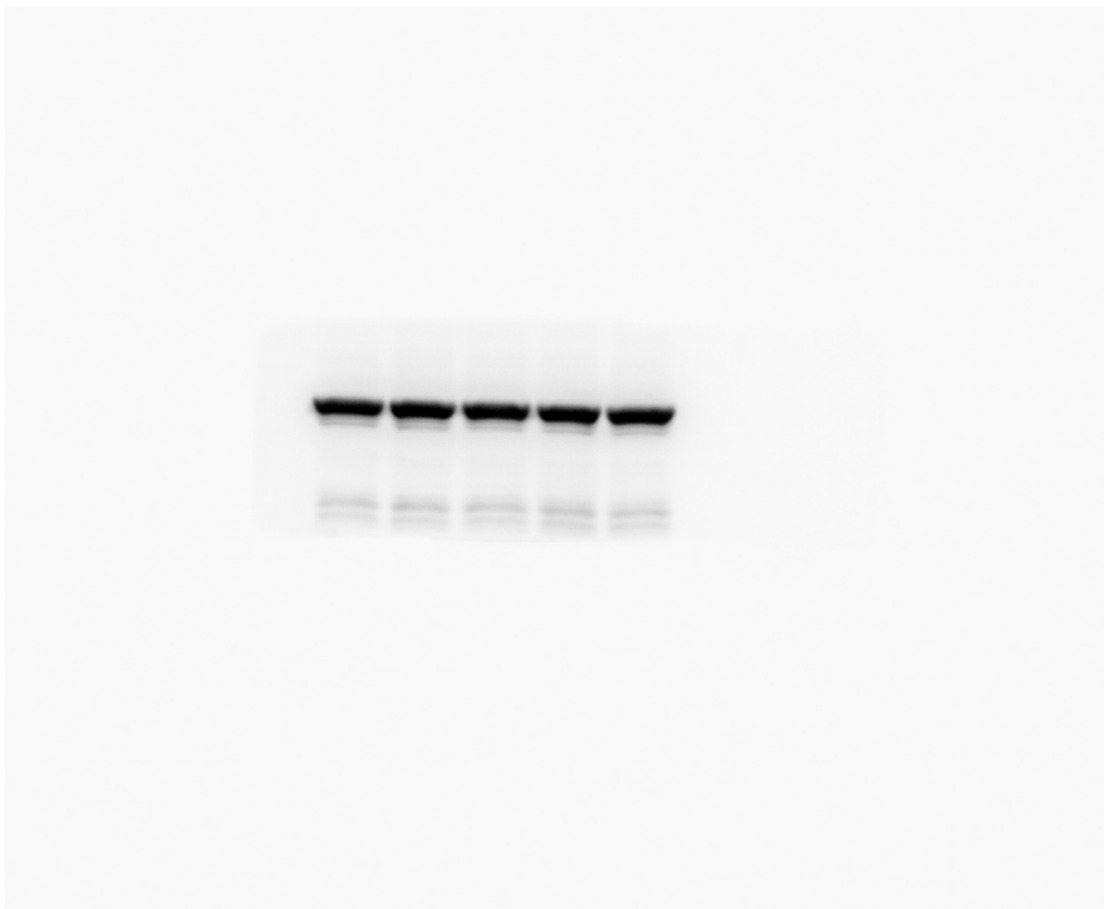

Second time actin-22kDa

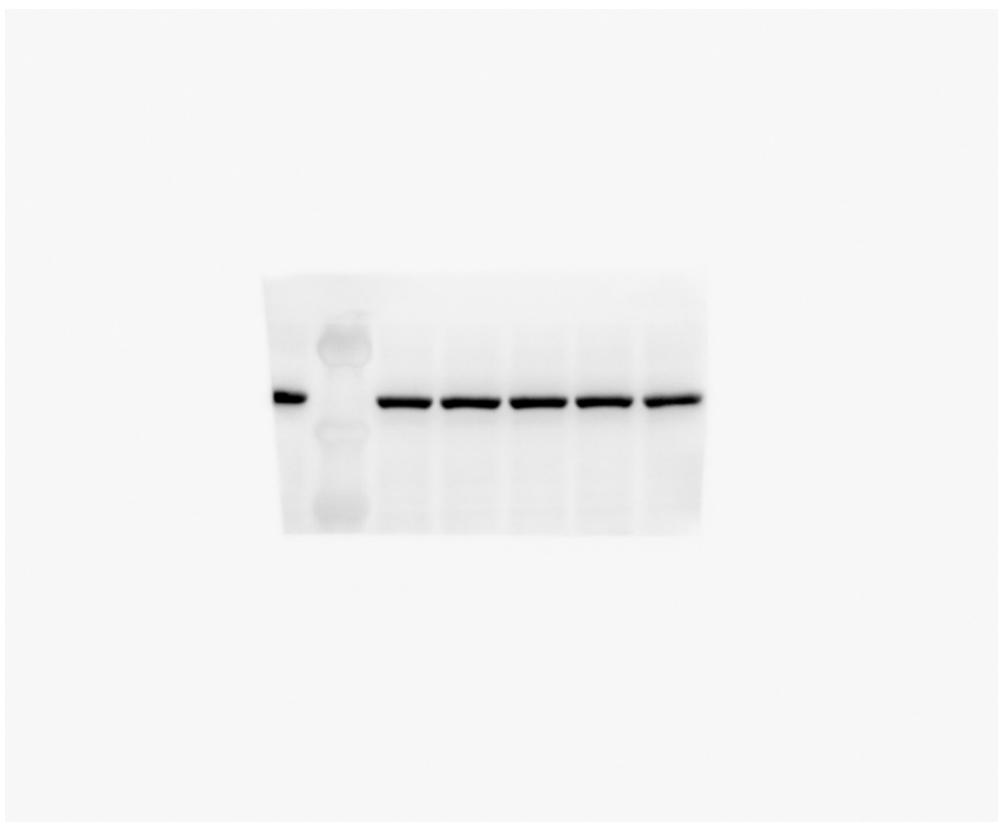

Third time actin-22kDa

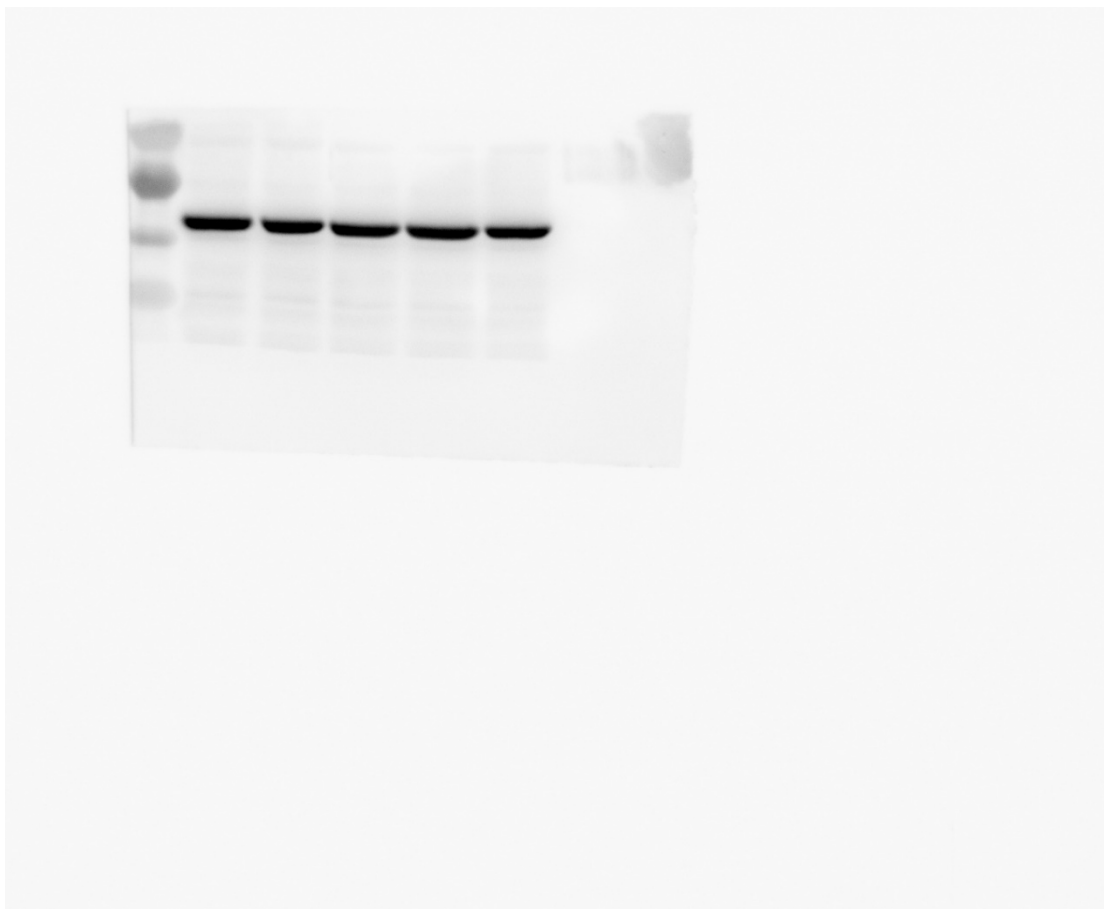

First time GPX4-42kDa

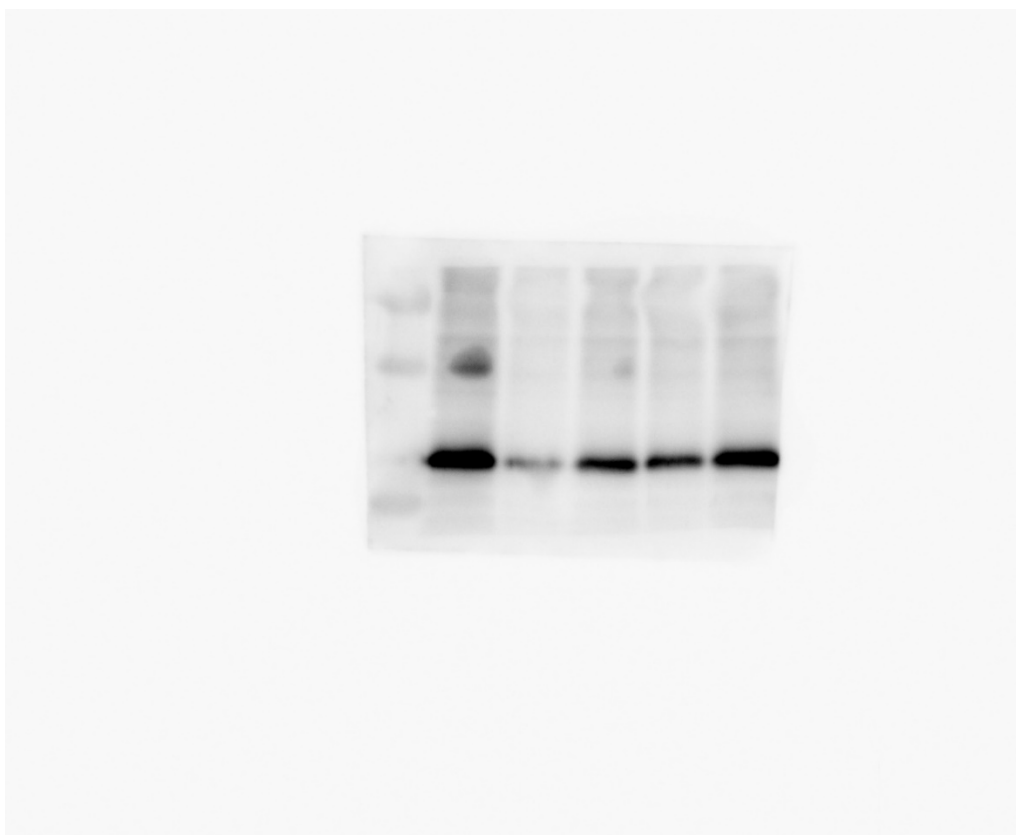

Second time GPX4-42kDa

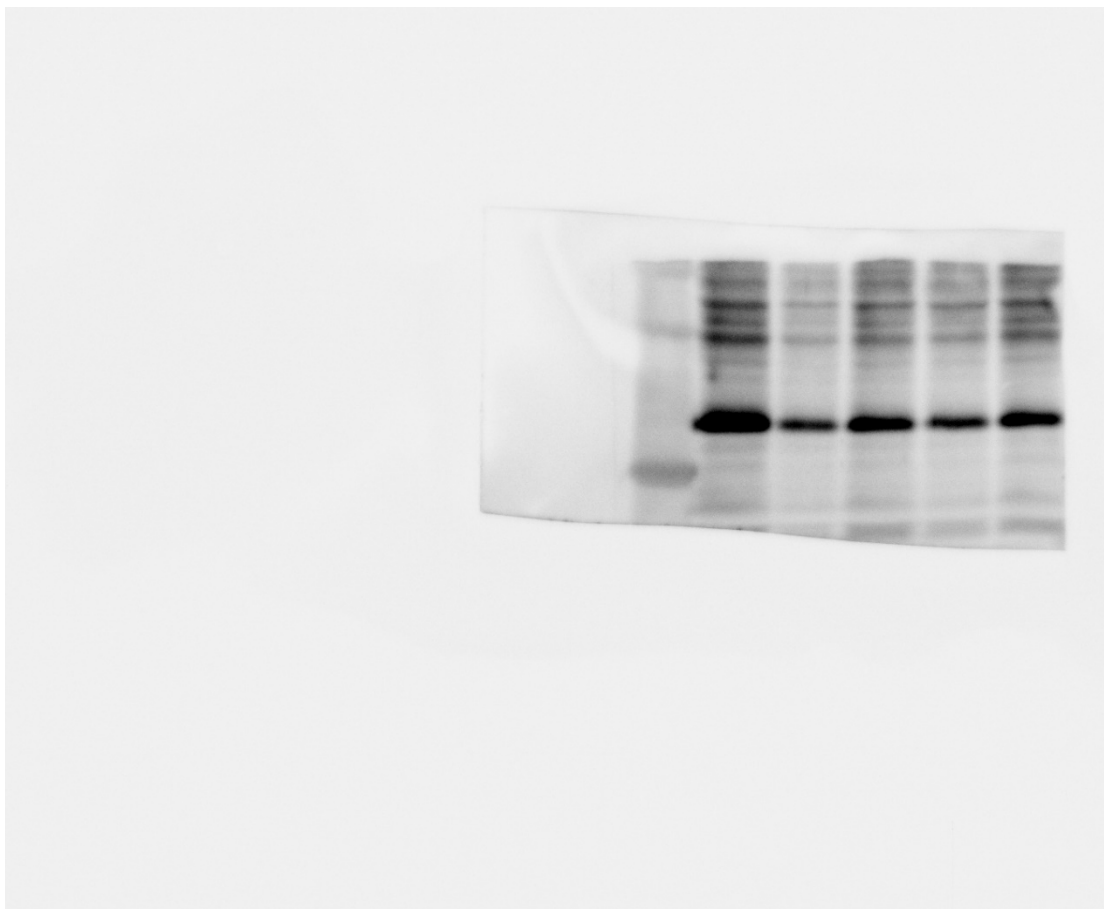

Third time GPX4-42kDa

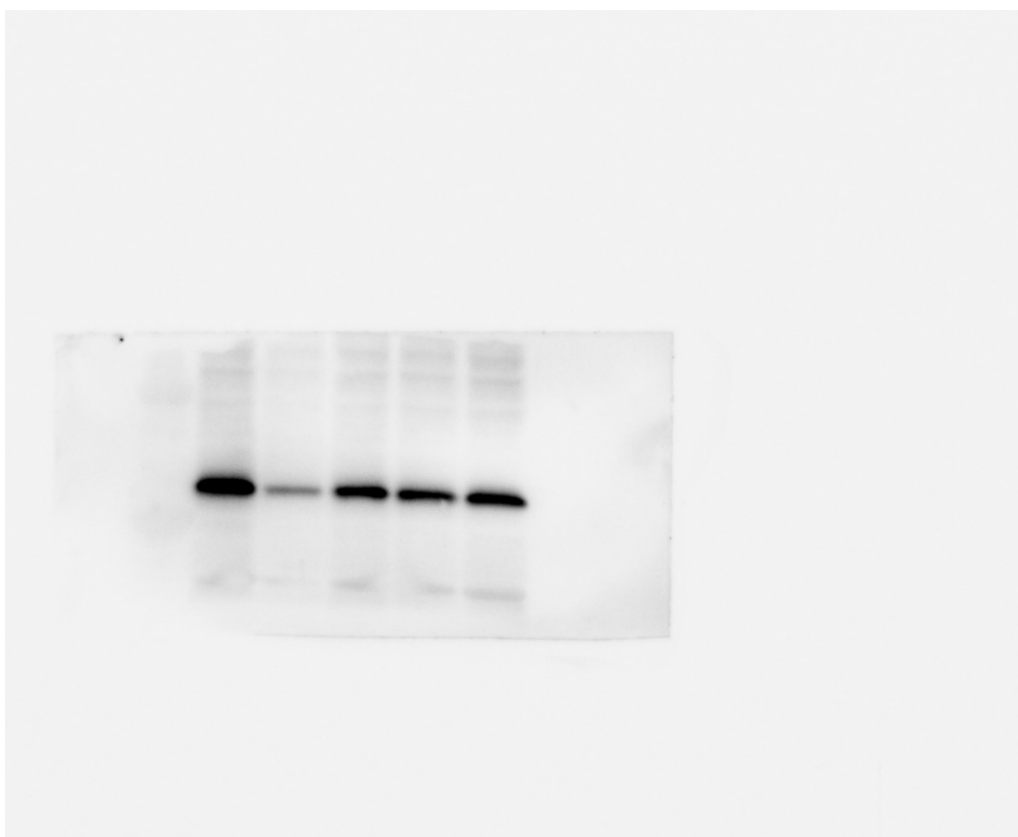

Supplement: MOESM1 [file 41598_2025_91905_MOESM1_ESM.pdf]
